# Supplementary material
Source: PubMed Central journal article supplement (PMC5441687)
Supplement: NIHMS857315-supplement-supplement_1.pdf [file NIHMS857315-supplement-supplement_1.pdf]

1 0.01. Scale bar: x = 4 min, y = 10% **(D)** TMA<sup>+</sup> traces of shifts in extracellular space volume ( $\alpha$ )  
2 following switch from sleep to awake-inducing aCSF (*upper trace*) or awake to sleep-inducing  
3 aCSF (*lower trace*) Note: higher amplitude = decreased dilution of TMA<sup>+</sup>, and smaller  
4 extracellular space. Data are summarized to the right. Paired t-test (**awake-inducing**:  $n = 16$   
5 animals;  $t(15) = 11.04$ ,  $P < 0.0001$ ; **sleep-inducing**:  $n = 11$  animals;  $t(10) = 8.95$ ,  $P < 0.0001$  )  
6 **\*\*P < 0.01**. Scale: x = 2 min, y = 2 mV. **(E)** Schematic of cisterna-magna infusion and wire  
7 EEG/EMG recording setup. **(F and G)** Representative traces showing EEG and EMG activity  
8 prior, during, and following a 0.3-0.5  $\mu\text{l min}^{-1}$  infusion of modified awake-inducing **(F)** or sleep-  
9 inducing **(G)** aCSF into the cisterna magna. The 1-4 Hz relative power (% of 1-32 Hz) is  
10 presented in averaged 10 min bins below. Infusion was run between ZT 5.5-7 (gray bar) **(F)** and  
11 ZT15-16.5 (purple bar) **(G)**, during sleep and awake periods, respectively. Scale bar: x = 30  
12 min, y = 0.5 mV **(F)**, 1mV **(G)**.

13

#### 14 **Supplementary Materials**

15 [www.sciencemag.org](http://www.sciencemag.org)

16 Materials and Methods

17 Figs. S1, S2, S3, S4, S5

18 Tables. S1

19 References (25-45)

20

21

22

23

24

25

26

27

28

29

30

31

32

33

34

35

36

37

38

39

40

## 1 **Supplementary Materials and Methods**

2  
3 All data were collected in male C57/BL6 mice (Charles River, 8-12 weeks) housed on a 12-hour  
4 light/dark cycle. A subset of mice were acclimated for > 2 weeks to a reverse-light cycle in order  
5 to facilitate awake-recording experiments. All experimental times are normalized to the diurnal  
6 cycle as zeitgeber (ZT) times, with ZT0 = the time of lights on (beginning of the sleep period),  
7 and ZT12 = the time of lights off (beginning of the awake period). The experiments were  
8 approved by the Institution of Animal Care and Use Committee of University of Rochester and  
9 performed according to guidelines from the National Institutes of Health. Efforts were taken to  
10 minimize the number of animals used.

## 11 12 **Preparation of Ion-Sensitive and ECoG Microelectrodes**

13  
14 Ion-sensitive and ECoG microelectrodes (ISM) for  $K^+$ ,  $Ca^{2+}$ ,  $Mg^{2+}$ , and  $H^+$  were pulled from  
15 single-barreled pipette glass (TW150-4) with a tip of < 2-3  $\mu m$  with a puller. Pipettes were  
16 silanized using dimethylsilane.  $K^+$ ,  $Ca^{2+}$ , and  $H^+$  ion-sensitive microelectrodes (ISMs) were  
17 loaded with a ~300  $\mu m$  column of valinomycin-based  $K^+$  ion-exchange resin (Potassium  
18 Ionophore I-Cocktail B),  $Ca^{2+}$  ion-exchange resin (Calcium Ionophore II- Cocktail A), or  $H^+$  ion  
19 -exchange resin (Hydrogen Ionophore I-Cocktail A) and backfilled with 150 mM KCl (25), 100  
20 mM  $CaCl_2$  (25), and phosphate-buffered saline (PBS) with a pH of 7.4 (26), respectively. A  
21 reference glass ECoG recording electrode was backfilled with 150 mM NaCl and placed < 50  
22  $\mu m$  from the ISM electrode.  $Mg^{2+}$  ISMs were prepared as described previously with minor  
23 modifications (27). Briefly, the  $Mg^{2+}$  ionophore was prepared using  $Mg^{2+}$  ion-exchange resin  
24 (Magnesium Ionophore IV). The original solvent (tetrahydrofuran) was replaced with a mixture  
25 prepared with cyclohexanone, o-NPOE (2-Nitrophenyl octyl ether), ETH500  
26 (Tetradodecylammonium tetrakis (4-chlorophenyl) borate), KTPC1PB (Potassium tetrakis (4-  
27 chlorophenyl) borate), PVC (Poly (vinyl chloride)). The solution was vortexed for at least 3  
28 hours, or until all the solutes were dissolved.

## 29 30 **Ion-sensitive Electrode Calibration for in vivo Recordings**

1 Electrodes were calibrated immediately prior to and following each experiment using either  
2 awake or sleep aCSF solutions and a stepwise gradient of  $K^+$  (2.5 mM, 3.5 mM, 4.5 mM),  $Ca^{2+}$   
3 (0.5 mM, 1.0 mM, 1.5 mM), or  $H^+$  (pH (6.5, 7.5, 8.5), titrated with 2 M HCl/1 M NaOH in the  
4 presence of 10 mM HEPES using a pH meter). Calibration data were fitted to the Nikolsky  
5 equation to determine the electrode slope and interference (28).  $Mg^{2+}$ -ISMs were calibrated in 3  
6 groups, each containing 0 mM, 1.0 mM, or 1.5 mM  $Ca^{2+}$  in addition to a stepwise gradient of  
7  $Mg^{2+}$  (0.5 mM, 1.0 mM, and 1.5 mM). In a subset experiments,  $Mg^{2+}$  microelectrodes were also  
8 tested in 0 mM  $Mg^{2+}$  and a gradient of  $Ca^{2+}$  (0.5 mM, 1.0 mM, and 1.5 mM) for calculation of  
9 the  $Ca^{2+}$ -selectivity coefficient.

10 While  $H^+$ ,  $K^+$ , and  $Ca^{2+}$  were highly selective,  $Mg^{2+}$  electrodes exhibited more variable  
11  $Ca^{2+}$  sensitivity. To correct for this, the selectivity coefficient of the electrode for  $Ca^{2+}$  ( $K_{MgCa}$ )  
12 was estimated in  $Mg^{2+}$  using the separate solution method (29), where the potentials observed at  
13 equal activity for  $Ca^{2+}$ -free and  $Mg^{2+}$ -free solutions are used to estimate  $K_{MgCa}$ . 5 of 22  
14 electrodes exhibited a  $K_{MgCa}$  outside the range of [0.1-0.6] and were excluded. The remaining  
15 values were averaged and used to correct for  $Ca^{2+}$  interference in sleep/wake and microdialysis  
16 studies, with  $[Ca^{2+}]_e$  shifts between states recorded with the  $Ca^{2+}$  ISM subtracted from  $[Mg^{2+}]_e$   
17 shifts during analysis. As an independent control analysis, the  $K_{MgCa}$  for the  $Mg^{2+}$  electrodes was  
18 used to calculate the change in  $[Ca^{2+}]_e$  when awake mice were anesthetized with isoflurane.

## 20 **Slice Preparation and recording of $[K^+]_e$**

21  
22 All the slices used for  $[K^+]_e$  recordings were prepared from adult mice (8-10 weeks) as described  
23 previously (30). Briefly, mice were anesthetized using 1.5% isoflurane in a closed chamber, were  
24 sacrificed, and brains were rapidly immersed in ice-cold cutting solution containing 230 mM  
25 sucrose, 2.5 mM KCl, 0.5 mM  $CaCl_2$ , 10 mM  $MgCl_2$ , 26 mM  $NaHCO_3$ , 1.25 mM  $NaH_2PO_4$ , and  
26 10 mM glucose (pH 7.2-7.4). Coronal slices (350  $\mu$ m) were prepared using a vibratome from  
27 ~bregma 1.0-1.5 mm, roughly somatosensory cortex. Slices were then transferred to an  
28 oxygenated aCSF containing 126 mM NaCl, 2.5 mM KCl, 2 mM  $CaCl_2$ , 2 mM  $MgCl_2$ , 26 mM  
29  $NaHCO_3$ , 1.25 mM  $NaH_2PO_4$ , and 10 mM glucose (pH 7.2-7.4, osmolality = 300 mOsm). Slices  
30 were incubated in aCSF for 1 to 5 hours at room temperature before recording. Throughout  
31 recordings, slices were superfused with aCSF containing 2.5 mM KCl, 2.0 mM  $CaCl_2$ , 2.0 mM

1 MgCl<sub>2</sub> gassed with 5% CO<sub>2</sub> and 95% O<sub>2</sub> at room temperature. For measurement of [K<sup>+</sup>]<sub>e</sub>, K<sup>+</sup>-  
2 ISM and saline backfilled reference electrodes were prepared as described above and inserted  
3 into the layer II-III somatosensory cortex, approximately 200 μm below the pial surface, within  
4 50 μm of each other. Following acquisition of a 10-20 minute stable baseline recording, the  
5 perfusion aCSF was switched with an aCSF with the same ionic concentrations in addition to a  
6 neuromodulator cocktail consisting of 40 μM NE (norepinephrine), 10 μM Ach (acetylcholine),  
7 10 μM DA (dopamine), 50 μM HA (histamine), and 400 μM ascorbic acid to prevent oxidative  
8 degradation. Concentrations were chosen based off of previous slice studies, and are based on  
9 effective concentrations used to see neuronal effects. These are higher than basal extracellular  
10 concentrations seen with in vivo microdialysis studies as 1) Microdialysis concentrations are the  
11 average concentration seen over extended timeframes, reducing their ability to measure transient  
12 changes resulting from burst-release events, 2) NE is highly susceptible to oxidation, potentially  
13 reducing both the effective concentration within slice as well as the level measured with  
14 microdialysis, 3) to our knowledge no slice studies have shown changes at microdialysis-derived  
15 concentrations, and 4) Significant metabolic, gene expression, and inflammatory changes  
16 accompanying slice preparation may reduce latent responsiveness to these modulators. A subset  
17 of slices were perfused with a cocktail solution containing 0.1 μM Orexin A and B, and, showing  
18 no significant difference in [K<sup>+</sup>]<sub>e</sub> increase (unpaired, two-tailed t-test of all cocktail ± TTX with  
19 versus without Orexin A/B; n = 7 slices with Orexin A/B, mean change = 0.342, SEM = 0.038  
20 mM [K<sup>+</sup>]<sub>e</sub>, n = 27 slices without, mean change = 0.363, SEM = 0.039 mM [K<sup>+</sup>]<sub>e</sub>: t(32) = 0.257, P  
21 = 0.799) were grouped with the remaining slices. Following a 20 minute recording period to  
22 determine transitions between solutions, the perfusion-aCSF was switched back to the baseline  
23 solution to permit recording of a 10-20 minute recovery period. Two separate groups of TTX  
24 recordings were performed. In the first set, perfusion aCSF was replaced with an aCSF  
25 containing 1 μM TTX in addition to the neuromodulator cocktail. In a second series of  
26 experiments, aCSF containing TTX was perfused 15 minutes prior to perfusion with TTX +  
27 neuromodulator cocktail. This group was added to completely block synaptic transmission prior  
28 to exposure to the neuromodulator cocktail. However, the groups exposed to TTX exhibited a  
29 comparable increase in [K<sup>+</sup>]<sub>e</sub> when exposed to the neuromodulator cocktail (one-way ANOVA  
30 of all groups relative to initial aCSF without TTX baseline: F (4,45) = 19.8, P < 0.0001], no  
31 significant difference was found using the Tukey post-hoc test between TTX groups where TTX

1 was added with the neuromodulator cocktail (mean  $\pm$  SEM) [ $0.31 \pm 0.04$ ] or 15 minutes prior  
2 [ $0.33 \pm 0.04$ ]) Tukey multiple comparison post hoc test,  $P > 0.9$ . For clarity both TTX groups  
3 were pooled and shifts in  $[K^+]_e$  for each change in solution (eg, aCSF to TTX or aCSF to  
4 neuromodulator cocktail + TTX) were compared. To evaluate peak amplitude changes in  $[K^+]_e$ ,  
5 a subset of slices were exposed to the inhibitor of glycolysis iodoacetate (3.5 mM) (31) for 10  
6 minutes after administration of the neuromodulator cocktail and prior to switching back to the  
7 baseline solution.

### 8 9 **Animal Preparation for *in vivo* recordings**

10  
11 Mice were prepared as described previously (32). Briefly, animals were anesthetized using  
12 isoflurane (1.5%) two days prior to recordings. A custom-made headplate was then affixed to  
13 the skull using dental cement to permit head-restraint. Over the following days, animals were  
14 gradually acclimated to head-restraint on the microscope stage for a total duration of 4-5 hours.  
15 The mice were resting in a padded container in a quiet dark room. Animals that were not  
16 sleeping during the last training sessions were excluded. To mimic recording sessions, efforts  
17 were taken to ensure minimal noise and light interference during training. On the morning of  
18 recordings animals were again anesthetized with isoflurane (1.5%), and a 1-1.25 mm cranial  
19 window was prepared over somatosensory cortex (-1.5 mm Anterior/Posterior, 3 mm  
20 Medial/Lateral). Custom-made EMG recording electrodes (From DSI, portable transmitter) were  
21 implanted within the neck musculature. Body temperature was maintained at 37°C. Animals  
22 were permitted to recover for a minimum of 30 minutes prior to recording.

### 23 24 **In vivo recordings of extracellular ion concentrations and ECoG**

25  
26 In vivo recordings of extracellular cation concentrations were obtained from layer II-III  
27 somatosensory cortex (200  $\mu$ m below the pial surface). For all experiments ECoG electrodes  
28 and ISMs were prepared as described above and inserted within 50  $\mu$ m of each other. ECoG and  
29 extracellular ion concentrations ( $[K^+]_e$ ,  $[Ca^{2+}]_e$ ,  $[Mg^{2+}]_e$ ,  $[H^+]_e$ ) were recorded in the awake, sleep,  
30 and 2% isoflurane anesthetized states. EMG recordings were obtained to further verify shifts  
31 between sleep, awake, and anesthetized states, in a subset of animals. ECoG and extracellular

1 ion concentrations data were sampled at 10 kHz and filtered from 0.1-2 kHz using an  
2 MultiClamp 700A /700B. Data were then digitized using Digidata 1322A, recorded using  
3 clampex 9.2 or clampex 10.2, and analyzed using Clampfit 9.2 or 10.2. EMG measurements  
4 were recorded using a DP-311 Differential Amplifier.

## 6 **Natural Sleep/Wake Transitions and Isoflurane Recordings**

7  
8 Natural transitions between sleep and wakefulness were recorded during the animals sleep period  
9 between ZT4-8 with the cranial window covered by the sleep aCSF (table S1). Efforts were  
10 taken to allow the animals to fall asleep, including contact with the same person and minimal  
11 noise interference. To compare natural transitions from sleep to awake states, sleeping mice were  
12 woken up by gentle air puffs directed at the tail or eyes. Isoflurane experiments were run during  
13 the awake period (ZT16-20) using awake aCSF to cover the cranial window. After obtaining a  
14 30-50 minute baseline recording, 2% isoflurane anesthesia was administered using an SAR  
15 830/P ventilator, SurgiVet vaporizer, and custom-made, rubber nose-cone. Anesthesia was  
16 maintained for 30-50 minutes to assess the stability of state-dependent shifts in extracellular ion  
17 concentrations, and recordings were continued for 20-60 minutes after discontinuing anesthesia.  
18 10 mM HEPES was excluded from the awake aCSF solution for recordings of awake to  
19 isoflurane anesthesia using the H<sup>+</sup>-ISM.

20 For analysis of ion concentrations, DC shifts were adjusted for through subtraction of the  
21 reference trace from the value obtained with the ISM. Resulting traces were then reduced to a 10  
22 Hz sampling interval using and exported into excel. Data (mV) were calculated as median  
23 voltage for each experiment, and were converted to mM values using the Nikolsky equation and  
24 individual electrode calibration curves. Sleep/wake transitions displayed a significant reduction  
25 in power averaging 30% (Fig. S1D-F), with increases in EMG activity, visually observed mouse  
26 activity and 1-4 Hz delta power.

27 To identify stable state-dependent shifts, state changes lasting a minimum of 1-minute  
28 were used. Four-separate 30 s epochs were used for each sleep/wake transition, with baseline  
29 sleep values being defined as the 30-60 s prior to the stimulation or clear sleep-wake transitions;  
30 non-overlapping awake periods followed 30-240 s post stimulation, as the ion trace appeared to  
31 reach a stable level, and recovery concentrations were calculated at least 5 minutes following the

1 return to sleep. For isoflurane recordings, two-minute bins were analyzed from immediately  
2 prior to isoflurane induction, cessation, and following stabilization of the ion trace minutes after  
3 discontinuation of anesthesia. In figures, the average of the 1-4 Hz power was binned and  
4 presented at 10-20 s (wake/sleep) or 3 min (Isoflurane traces) in order to illustrate transitions.

5 ECoG power was analyzed using a custom-written Matlab code. In brief, data were  
6 exported from Clampex into Matlab, and spectrograms were derived for each transition. The  
7 average power density and prevalence for each segment corresponding to each sleep or awake  
8 state was taken over 4 or 10s epochs and used for raw power analyses. Relative power was  
9 calculated by normalizing traces to the total 1-32 Hz power. CNQX raw power analysis of EMG  
10 was performed similarly using the sum of 1-100 Hz frequencies. To reduce movement-related  
11 noise, epochs exhibiting >2x the mean awake value were excluded from analysis (Avg. 2.97% of  
12 CNQX ECoG epochs). For CNQX spectral analysis, data were exported to matlab and converted  
13 to power density using the fast fourier-transform function, normalized to 1-32 Hz power to  
14 derive relative prevalence, and plotted using Prism.

15 To determine the duration of shifts between states, data were similarly reduced to 10-100  
16 Hz bins, and state shifts were defined as the time taken for an ion to increase or decreased from  
17 its pre-transition baseline to 90% of its stable post-transition concentration. To better gauge  
18 sleep-wake shifts, these shifts were matched to shifts in ECoG total power, as well as shifts in 1-  
19 4 Hz prevalence and EMG power when possible to determine correlations between  
20 electrophysiological and ionic measures of wakefulness. Further, isoflurane-induction was  
21 measured from the beginning of isoflurane administration. To adjust for noise, a 0.02-2 s rolling  
22 average was taken, and shifts were determined as the earliest point crossing the 90% threshold -  
23 *provided* that the increase/decrease was sustained for a minimum of 0.5 s.

24 Representative ion traces were presented as the 2 s (sleep/wake traces, 10 ms bins) or 20  
25 s (isoflurane and CNQX traces, 100 ms bins) rolling average of the raw data. Data were graphed  
26 and analyzed using Prism 5. For each group, a one-way, repeated-measures ANOVA was  
27 performed and groups were individually compared using a Tukey post-Hoc test for transitions  
28 between sleep/wake, CNQX, and isoflurane.

### 29 30 **Recordings evaluating the effect of CNQX on extracellular ion concentrations**

31

1 To define the role of excitatory transmission on state-dependent changes in extracellular  
2 ion concentrations, the AMPA receptor antagonist 6-Cyano-7-nitroquinoxaline-2,3-dione,  
3 CNQX was added to the bath aCSF in a subset of experiments. In these studies, 30 minute  
4 baseline recordings were obtained using awake mice with awake aCSF covering the cranial  
5 window (table S1). Following this period, the awake aCSF solution was substituted with the  
6 same solution containing 200  $\mu$ M CNQX as described previously (33). ECoG and ion levels  
7 typically stabilized within 10 minutes, and recordings under CNQX were continued for an  
8 addition 10-20 minutes. ECoG power was analyzed using the power spectrum function available  
9 in Clampfit 10.2. Data were exported to excel and power values were summed over the 1-32 Hz  
10 range to determine total power. In order to guarantee substantial reduction of ECoG power  
11 under CNQX for determination of the effects of excitatory neuronal activity on shifts in  
12 extracellular ion concentration, animals exhibiting less than a 60% reduction in ECoG power  
13 under CNQX were excluded from analysis. 2% isoflurane was subsequently administered  
14 through a nose cone and recordings were continued in the presence of both CNQX and isoflurane  
15 for an additional 40-60 minutes.

### 17 **Defining the effects of changing aCSF solutions on Extracellular Ion Concentrations**

18  
19 To recapitulate state-dependent shifts in  $[K^+]_e$ ,  $[Ca^{2+}]_e$ ,  $[Mg^{2+}]_e$ , and  $[H^+]_e$  in extracellular space,  
20 we conducted a series of exploratory experiments to determine the magnitude of shifts in ion  
21 concentration at 200  $\mu$ M below the cortex resulting from changing the aCSF solution over the  
22 cortex. Using this, we designed a series of aCSF solutions to mimic previous *in vivo* recordings  
23 of awake and sleep states as well as “awake-inducing“ and “sleep-inducing” aCSFs (table S1),  
24 which were designed to drive cation concentration shifts similar to natural sleep/awake  
25 transition. For all of the following experiments, the solutions in *table S1* were used to either  
26 maintain the current brain-state dependent ionic milieu or drive concentrations of  $[K^+]_e$ ,  $[Ca^{2+}]_e$ ,  
27  $[Mg^{2+}]_e$ , and  $[H^+]_e$  to the opposing behavioral state (eg, shifting the brain locally from sleep to  
28 awake in sleeping mice by removing sleep aCSF and replacing it with awake-inducing aCSF  
29 (table S1, Group 2). These transitions were all validated with ISMs as described above and as  
30 shown in Fig. S4.

31 Transitions for sleeping mice were recorded from ZT4-8 during the mouse’s natural sleep



1 cycle. In these experiments, sleep aCSF was placed over the cortex of sleeping mice, and was  
2 later replaced with awake-inducing aCSF in order to determine the magnitude of the shift for  
3 each ion measured. Likewise, transitions for awake mice were recorded between ZT16-20,  
4 during the mouse's natural awake period. Following a baseline period using awake aCSF  
5 solution over the cortex, aCSF was changed to the sleep-inducing solution and resulting ion  
6 changes were measured. 30-40 minute recordings were taken for each solution to permit ion  
7 equilibration and to test the stability of shifts in interstitial ion concentration (20-30 minutes).  
8  $[Ca^{2+}]_i$  was held constant in  $[Mg^{2+}]_e$ -experiments to eliminate the effect of changes in  $[Ca^{2+}]_i$ -  
9 interference resulting from changing the aCSF solution. Efforts were taken to carefully change  
10 the solutions in surface pool without touching either electrode and to minimize disturbing the  
11 mice during the process. The median of a 1-minute stable epoch was selected following  
12 equilibration, usually 10-20 minutes after applying a solution, and converted into mM using the  
13 Nikolsky equation. Data from these experiments were plotted and statistics were analyzed using  
14 Prism 5 using two-tailed, paired t-tests and one-way repeated measures ANOVA with post-hoc  
15 Tukey multiple comparisons tests to determine differences in 2 and 3 group experiments,  
16 respectively.

17

### 18 **Effects of manipulating extracellular ion concentration on local ECoG Activity**

19

20 To evaluate the effect of imposing changes in the extracellular ion concentration, 1.0-1.25 mm  
21 cranial windows were prepared symmetrically over both hemispheres (-1.25 mm  
22 Anterior/Posterior, 3 mm Medial/Lateral), and a glass ECoG recording electrode was inserted  
23 symmetrically 200  $\mu$ m deep in each hemisphere. In the first set of experiments, recordings were  
24 obtained between ZT4-8 to study the effects of awake-inducing aCSF on sleeping mice. In this  
25 experiment, sleeping mice were prepared as described above, with sleep aCSF over both the left  
26 and right cranial windows (table S1). Concentrations were chosen to elicit shifts in interstitial  
27 ion composition at 200  $\mu$ M below the pial surface comparable to those seen in natural  
28 sleep/wake transitions, and did not vary by more than 1-2.5 mM of baseline levels for both sleep  
29 and awake states in any formulation in order to minimize gradient effects occurring between the  
30 surface of the brain and the recording depth. Following a baseline ECoG recording, the solution  
31 covering the left window was removed and replaced with awake-inducing aCSF (table S1).

1 ECoG recordings were converted into power-spectra using clampfit 10.2, and data were exported  
2 to excel. Raw power from each hemisphere was normalized to 1-32 Hz overall power for each  
3 trace, and the 1-4 Hz slow-wave power from the left (aCSF changed) hemisphere was  
4 normalized to the right hemisphere to account for potential differences resulting from natural,  
5 whole-brain state fluctuations. In the second set of experiments, awake animals were recorded  
6 between ZT16-20. Following a baseline period where awake aCSF was placed over both  
7 hemispheres, the solution over the left hemisphere was removed and replaced with sleep-  
8 inducing aCSF (table S1). ECoG was analyzed as before, data were graphed and analyzed using  
9 Prism 5, and a two-tailed, paired t-test was used to compare the difference in normalized delta  
10 power between baseline and left-window-altered groups.

### 11 12 **Iontophoretic tetramethylammonium (TMA<sup>+</sup>) quantification of the extracellular space** 13 **volume**

14 All experimental procedures were adapted from previous studies (10, 11, 28, 34-37). For  
15 measurements of TMA<sup>+</sup>, microelectrodes with an outer diameter of 2–3  $\mu\text{m}$  were fabricated from  
16 double-barreled theta-glass using a tetraphenylborate-based ion exchanger. The TMA<sup>+</sup> barrel was  
17 backfilled with 150 mM TMA-chloride and the reference barrel filled with 150 mM NaCl and 10  
18  $\mu\text{M}$  Alexa 568. All recordings were obtained by inserting the two electrodes to a depth of 200  
19  $\mu\text{m}$  below the cortical surface in somatosensory cortex. The electrode tips were imaged after  
20 insertion using 2-photon excitation to determine the exact distance between the electrodes  
21 (typically  $\sim 150 \mu\text{m}$ ). The TMA<sup>+</sup> signal was calculated by subtracting the voltage measured by  
22 the reference barrel from the voltage measured by the ion-detecting barrel using a dual-channel  
23 microelectrode preamplifier. The Nikolsky equation was used for calibration of the TMA<sup>+</sup>  
24 electrodes based on measurements obtained in electrodes containing 0.5, 1, 2, 4, and 8 mM  
25 TMA-chloride in 150 mM NaCl. A series of currents of 20 nA, 40 nA, 80 nA, and 120 nA were  
26 applied using a dual-channel microelectrode preamplifier, and measurements were acquired  
27 relative to similar recordings obtained in 0.3% agarose prepared from a solution containing 0.5  
28 mM TMA-Cl and 150 mM NaCl. A custom-made MATLAB software, ‘Walter’, developed by  
29 C. Nicholson was used to calculate  $\alpha$  and  $\lambda$  values.

30 For CNQX experiments, awake mice were prepared as described above with the TMA<sup>+</sup>  
31 electrodes located in the somatosensory cortex. The first set of animals was prepared with awake

1 aCSF (table S1) placed over the cortex. TMA<sup>+</sup> values were estimated both prior to and after the  
2 administration of 2% isoflurane through a nose cone. For the second set of experiments awake  
3 mice were prepared starting with awake aCSF over the surface of the cortex. Following a brief  
4 baseline recording period the awake aCSF was removed and replaced with awake aCSF  
5 containing 200  $\mu$ M CNQX. TMA<sup>+</sup> pulses were then given both during the CNQX/awake state as  
6 well as after the administration of 2% isoflurane (isoflurane + CNQX). For these experiments a  
7 1-minute window of the ECoG prior to the first TMA<sup>+</sup> pulse was used for a power spectrum  
8 analysis with Clampfit 10.2. The resulting 1-32 Hz power was summated and normalized to the  
9 base pre-CNQX baseline to determine the % change in ECoG power.

10 To study shifts in extracellular space resulting from changes in surface aCSF, two cohorts  
11 of mice were used. In the first set of recordings, mice were prepared as described above with  
12 sleep aCSF over the surface of the brain (table S1), and were lightly anesthetized using 1%  
13 isoflurane to prevent awakening mice during frequent manipulations. Following baseline TMA<sup>+</sup>  
14 recordings, sleep aCSF was replaced with awake-inducing aCSF and a second set of TMA<sup>+</sup>  
15 recordings was conducted. In the second set of recordings, awake mice were prepared as above  
16 with awake aCSF placed over the surface of the brain. Again following recording of baseline  
17 TMA<sup>+</sup> values, awake aCSF was removed and replaced with sleep-inducing aCSF. TMA<sup>+</sup> values  
18 were collected again to determine if local ionic changes could increase the extracellular space  
19 volume similar to natural sleep. The  $\alpha$  and  $\lambda$  values were compared between each pair of aCSF  
20 solutions without moving the electrodes respectively (table S1). Tortuosity ( $\lambda$ ) was consistent  
21 with previous reports (11), with  $\lambda$  increasing slightly from  $\lambda = 1.71 \pm 0.02$  to  $1.77 \pm 0.03$ , paired  
22 t-test:  $t(15) = 3.425$ ,  $P = 0.004$ , in sleep aCSF to awake-inducing aCSF experiments and  
23 remaining unchanged ( $\lambda = 1.52 \pm 0.07$  to  $1.52 \pm 0.07$ , paired t-test,  $t(10) = .0844$ ,  $P = 0.934$ ) in  
24 awake aCSF to sleep-inducing aCSF experiments. A two-tailed, paired t-test was used to test for  
25 statistically significant differences between groups.

26

## 27 **EMG and EEG recording during Cisterna Magna Infusion**

28

29 For EMG and EEG recording electrodes were prepared as described previously (38). Briefly,  
30 six-channel, custom-made EEG/EMG recording electrodes were prepared by soldering small  
31 (<0.75'') segments of insulated 0.008'' silver wire into gold-pin connectors. These electrodes

1 were then combined into a six-channel EEG electrode holder and secured using dental cement.  
2 The EEG and electromyogram (EMG) recording wires were inserted over the surface of the skull  
3 (4 electrodes) and the neck musculature (2 electrodes). For aCSF infusion, a cisterna magna  
4 cannula was implanted (30G blunted needle) and connected with closed-end polyethylene tubing,  
5 which was pre-filled with aCSF and sealed. The cannula was sealed into the skull with cement.  
6 After recovery from anesthesia, mice were placed in a recording chamber, and the electrode  
7 holder was connected to a 6-channel commutator to permit free movement of the mouse within  
8 the chamber. Food and water were freely accessible in the recording cages.

9 For the first set of experiments animals were habituated overnight to permit the  
10 recordings to stabilize and all infusions/recordings were conducted during the animal's light  
11 cycle, where it has the highest proclivity toward sleep (39). Recording sessions were started at  
12 ZT2 to record baseline EEG/EMG activity. The cisterna magna cannula was opened and  
13 connected to a dual-channel Harvard Apparatus syringe pump and perfused at  $0.3 \mu\text{l min}^{-1}$  with  
14 sleep aCSF for a minimum of 30 minutes to equilibrate the system and eliminate animals in  
15 which the baseline aCSF infusion changed EEG activity. The sleep aCSF was replaced with a  
16 modified awake-inducing solution of (10 mM KCl, 0.5 mM  $\text{CaCl}_2$ , 0.3 mM  $\text{MgCl}_2$ , pH 8.9) and  
17 the brain was perfused for approximately 1.5 hrs at  $0.3 \mu\text{l min}^{-1}$ . After this period aCSF infusion  
18 was terminated and the EEG/EMG recording was continued until ZT12 for analysis of recovery.  
19 We conducted the second set of experiments between ZT13 and ZT20, where animals have the  
20 highest proclivity for wakefulness (39). In this set of experiments, animals were first implanted  
21 with EEG/EMG recording electrodes and CM cannula, and habituated to the recording setup. On  
22 the day of recording, animals were given 12 hours to acclimate to the recording setup and  
23 EEG/EMG recordings were started at the beginning of the dark cycle (ZT12). One-hour later,  
24 awake aCSF infusion was commenced at  $0.5 \mu\text{l min}^{-1}$  to evaluate the effect of aCSF infusion  
25 upon the EEG signal. Again, the few animals that displayed a change in EEG signal in response  
26 to aCSF infusion were not used. After a minimum of 30 minutes awake aCSF-infusion, a ~1.5  
27 hour infusion of modified sleep-inducing aCSF (1.5 mM KCl, 2.5 mM  $\text{CaCl}_2$ , 4.5 mM  $\text{MgCl}_2$ ,  
28 pH 7.0) was conducted at the same rate, with EEG/EMG recordings continued for several hours  
29 afterward to permit analysis of the mouse's return to normal circadian activity. Modified aCSF  
30 ion concentrations and influx rates calculated based off several major considerations: 1)  
31 Previous studies have shown the rate of CSF production and absorption in the brain is roughly

1 0.37  $\mu\text{l min}^{-1}$  (40). Infusion rates were comparable to this with slight differences in sleep and  
2 awake to account for differences in the possible concentration of infused ions. Ion  
3 concentrations were estimated first assuming constant mixing of the infused aCSF and  
4 continuous endogenous CSF production. (eg. assuming in the natural sleep state a 0.37  $\mu\text{l min}^{-1}$   
5 rate of CSF production containing 3.86 mM  $\text{K}^+$  and a 0.3  $\mu\text{l min}^{-1}$  infusion rate of 10 mM  $\text{K}^+$ -  
6 aCSF, this would mix to create a constant 6.6mM  $\text{K}^+$  in CSF; not considering continuous CSF  
7 and ion clearance) 2) In addition to the continuous mixing of new CSF and the infusion aCSF,  
8 total brain volume is  $\sim 503\text{-}637 \mu\text{l}$  in adult mice (40-42). As such, with a 0.3  $\mu\text{l min}^{-1}$  infusion  
9 rate, this would be approximately 0.0029-0.0036 mM  $\text{min}^{-1}$  assuming dilution into a single fluid  
10 compartment. 3) While it is possible that the dorsal surface of the brain and the spinal cord near  
11 the infusion site may be exposed to higher concentrations of the cations in these experiments, our  
12 previous work with the glymphatic system shows that CSF is transported by convective fluxes  
13 through the brain parenchyma and along the vasculature effectively, distributing changes over a  
14 large volume and preventing substantial buildup at any given point. Finally, 4) the brain is  
15 highly effective at clearance of cations, particularly  $\text{K}^+$ , which can be quickly cleared from the  
16 extracellular space by astrocytes and redistributed to neighboring astrocytes (43). EEG  
17 recordings were conducted using an XLTEK, 32-channel EEG system. Electrodes were  
18 referenced to one skull electrode and saved using XLTEK, and data were analyzed using  
19 Neuroscore to determine percent prevalence (Delta: 1-4 Hz, Theta: 4-8 Hz, Alpha: 8-13 Hz,  
20 Beta: 13-32 Hz) and time spent asleep/awake.

21

## 22 **Quantification of extracellular cation concentrations using microdialysis**

23

24 To determine state-dependent changes in  $[\text{K}^+]_e$ ,  $[\text{Ca}^{2+}]_e$ ,  $[\text{Mg}^{2+}]_e$  in the cortex of awake, sleeping,  
25 and anesthetized mice a microdialysis guide cannula was positioned within the medial prefrontal  
26 cortex at a location of AP +2.0, ML +0.3 from Bregma, and DV -1.0 below the dura, as  
27 described previously (10). The guide cannula was secured to the skull using dental cement and  
28 animals were permitted to recover. 3-5 days later, a 2-mm microdialysis probe was inserted into  
29 the brain and perfused with filtered aCSF (For  $\text{K}^+$  and  $\text{Ca}^{2+}$ : 155 mM NaCl, 4 mM KCl, 1.25 mM  
30  $\text{CaCl}_2$ , 2 mM  $\text{Na}_2\text{HPO}_4$ , and 0.85 mM  $\text{MgCl}_2$ ; For  $\text{Mg}^{2+}$ : 140 mM NaCl, 4 mM KCl, 1.25 mM  
31  $\text{CaCl}_2$ , 20 mM  $\text{NaHCO}_3$ , and 0.85 mM  $\text{MgCl}_2$ , both adjusted to 300-305 mOsm and pH=7.35-

1 7.40). Animals were allowed to recover for a minimum of 3 hours following probe implantation,  
2 with sleep samples collected between ZT2-8 and awake samples collected between ZT14-20.  
3 Isoflurane measurements were typically performed between ZT14-20 as well, and mice were  
4 monitored to maintain body temperature throughout 1.5% isoflurane anesthesia. For ion  
5 measurement studies, a gradient of 5-aCSF solutions was used for each ion to estimate the true  
6 brain concentration. For each ion, the above aCSF was used with minor changes in the  
7 concentration of the ion being studied. The gradients used were:  $[K^+] = (1.75, 2.5, 3.25, 4.0, \text{ and } 4.75 \text{ mM})$ ;  
8  $[Ca^{2+}] = (0.5, 1.0, 1.5, 2.0, \text{ and } 2.5 \text{ mM})$ ; and  $[Mg^{2+}] = (0.5, 0.9, 1.3, 1.7, \text{ and } 2.1$   
9  $\text{mM})$ . Sets of 5-20  $\mu\text{l}$  samples were collected at a rate of  $1 \mu\text{l min}^{-1}$  using a dual-channel syringe  
10 pump, and tubing was washed between each sample to prevent cross-contamination. Sample  
11 orders were randomized in each animal to prevent bias from sequential ordering, and samples  
12 were immediately frozen following collection.

13 For measurements of ion concentrations in sample solutions, ISMs were prepared as  
14 described above, and calibrations were performed before and after each sample or set of 2-3  
15 samples. Calibration solutions used were taken from the same daily stock solutions used for  
16 microdialysis, with two different base aCSF solutions: For  $K^+$  and  $Ca^{2+}$  studies, aCSF contained  
17 4.0 mM KCl, 1.25 mM  $CaCl_2$ , 0.85 mM  $MgCl_2$ , 155 mM NaCl, and 2 mM  $NaH_2PO_4$ . Due to  
18 interference between  $NaH_2PO_4$  and the  $Mg^{2+}$ -ionophore,  $Mg^{2+}$  microdialysis studies used aCSF  
19 containing 4.0 mM KCl, 1.25 mM  $CaCl_2$ , 0.85 mM  $MgCl_2$ , 140 mM NaCl, and 20 mM  
20  $NaHCO_3$ ). Solutions were titrated to pH = 7.35-7.4 using 1 M NaOH and 1 M HCl, and were  
21 adjusted to an osmolality of 300-305 mOsm using 1.45 M NaCl and a micro-osmometer. For  
22 each set of ion analyses, aCSF contained a stepwise change in the ion concentrations.  $K^+$   
23 calibration solutions = [1.0, 1.75, 2.5, 3.25, 4.0, 4.75, and 5.5 mM  $K^+$ ];  $Ca^{2+}$  aCSF calibration  
24 solutions = [0.5, 1.0, 1.5, 2.0, 2.5, 3.0 mM  $Ca^{2+}$ ]; and  $Mg^{2+}$  aCSF calibration solutions = [0.5,  
25 0.9, 1.3, 1.7, 2.1, and 2.5 mM  $Mg^{2+}$ ]. Calibration slopes and intercepts were calculated using the  
26 Nikolsky equation and, for  $Mg^{2+}$  electrodes, the  $Ca^{2+}$ -selectivity coefficient described above was  
27 used. Samples were matched to the nearest corresponding 4 concentrations for each calibration to  
28 optimize the fit. (eg, for 1.0 mM  $Mg^{2+}$  the calibration curve used the 0.5, 0.9, 1.3, and 1.7 mM  
29  $Mg^{2+}$  solutions). Of note, the same two-aCSF solutions were used for the calibrations of the ion  
30 selective microelectrodes as used during the microdialysis. Calibrations and samples were tested  
31 by adding 20  $\mu\text{l}$  of each solution to a glass coverslip. A ground wire, reference-electrode, and

1 ion-sensitive microelectrode were then inserted and allowed to stabilize. All samples were  
2 collected and analyzed by different investigators and the samples blinded prior to ion  
3 measurements. Following acquisition, data were analyzed using ClampFit 10.2 with resulting  
4 data fit to each calibration curve using the Nikolsky equation to determine the ion concentration  
5 of the sample.  $[Mg^{2+}]_e$  measurements were adjusted for background  $[Ca^{2+}]$  using the  $[Ca^{2+}]$   
6 selectivity coefficient described above. Data were plotted as the concentration of the ion in the  
7 aCSF entering the microdialysis probe versus the change in concentration in the solution  
8 collected ( $[ion]_{in}$  vs.  $[ion]_{in} - [ion]_{out}$ ). Using the no-net flux method (44, 45), and a root-mean  
9 squared linear regression was plotted using Microsoft Excel. From this, the x-intercept was  
10 taken as the estimated point of no-net flux across the probe membrane; ie, the true brain  
11 concentration of the ion. Differences between states were identified using a one-way ANOVA  
12 and Tukey post hoc test for  $K^+$ , and an unpaired, two-tailed t-test for shifts between pre-  
13 isoflurane and isoflurane states for  $Ca^{2+}$  and  $Mg^{2+}$ .

14  
15  
16

**Fig. S1**

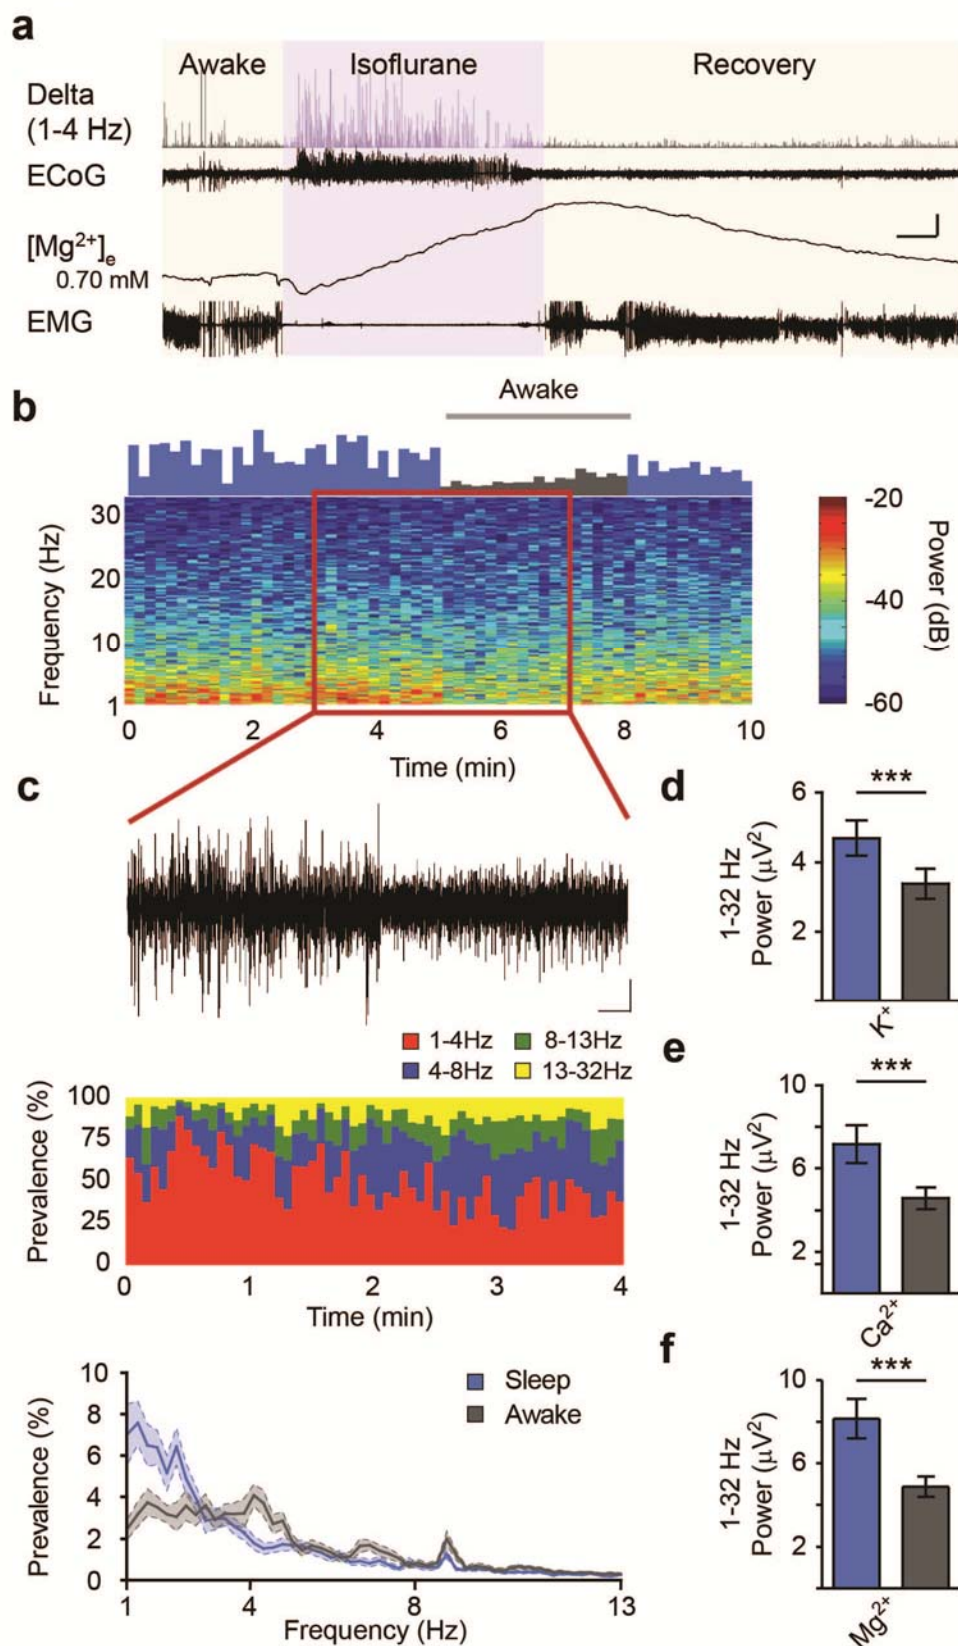



1 **Fig. S1.** ECoG power and prevalence shifts in sleep to awake transitions. (A) Representative  
2 trace from  $[Mg^{2+}]_e$  isoflurane showing the raw delta power shift in 10 s epochs throughout the  
3 baseline, isoflurane, and recovery periods. (B) Total Power and spectrogram of a single  
4 representative sleep  $\rightarrow$  wake  $\rightarrow$  sleep transition plotted from 1-32 Hz with power density given  
5 by color spectrum depicted to the right. Note relative differences between density of low-  
6 frequency between initial sleep and awake periods as well as the gradual increase in delta in  
7 early stages of sleep following wakefulness. Data presented in 10 s epochs. (C) Representative  
8 ECoG trace, relative power prevalence in 4 s epochs, and the average power from each  
9 sleep/wake epoch, binned by 0.25 Hz, for the 4 min period centered on the sleep/wake transition.  
10 Power by presented in lower panel is displayed as mean (dark line)  $\pm$  SEM (shaded area)(D-F)  
11 Summary of total power shifts (1-32 Hz) from sleep  $\rightarrow$  awake transitions. Paired t-test for each  
12 group: (D)  $t(26) = 5.698$ ,  $P < 0.0001$ . (E)  $t(27) = 4.218$ ,  $P = 0.0002$ . (F)  $t(71) = 5.678$ ,  $P <$   
13  $0.0001$ . Data are presented as mean  $\pm$  SEM with sleep bars shown in blue, and awake bars in  
14 gray.

15  
16  
17  
18  
19  
20  
21  
22  
23  
24  
25  
26  
27  
28  
29  
30  
31

**Fig. S2**

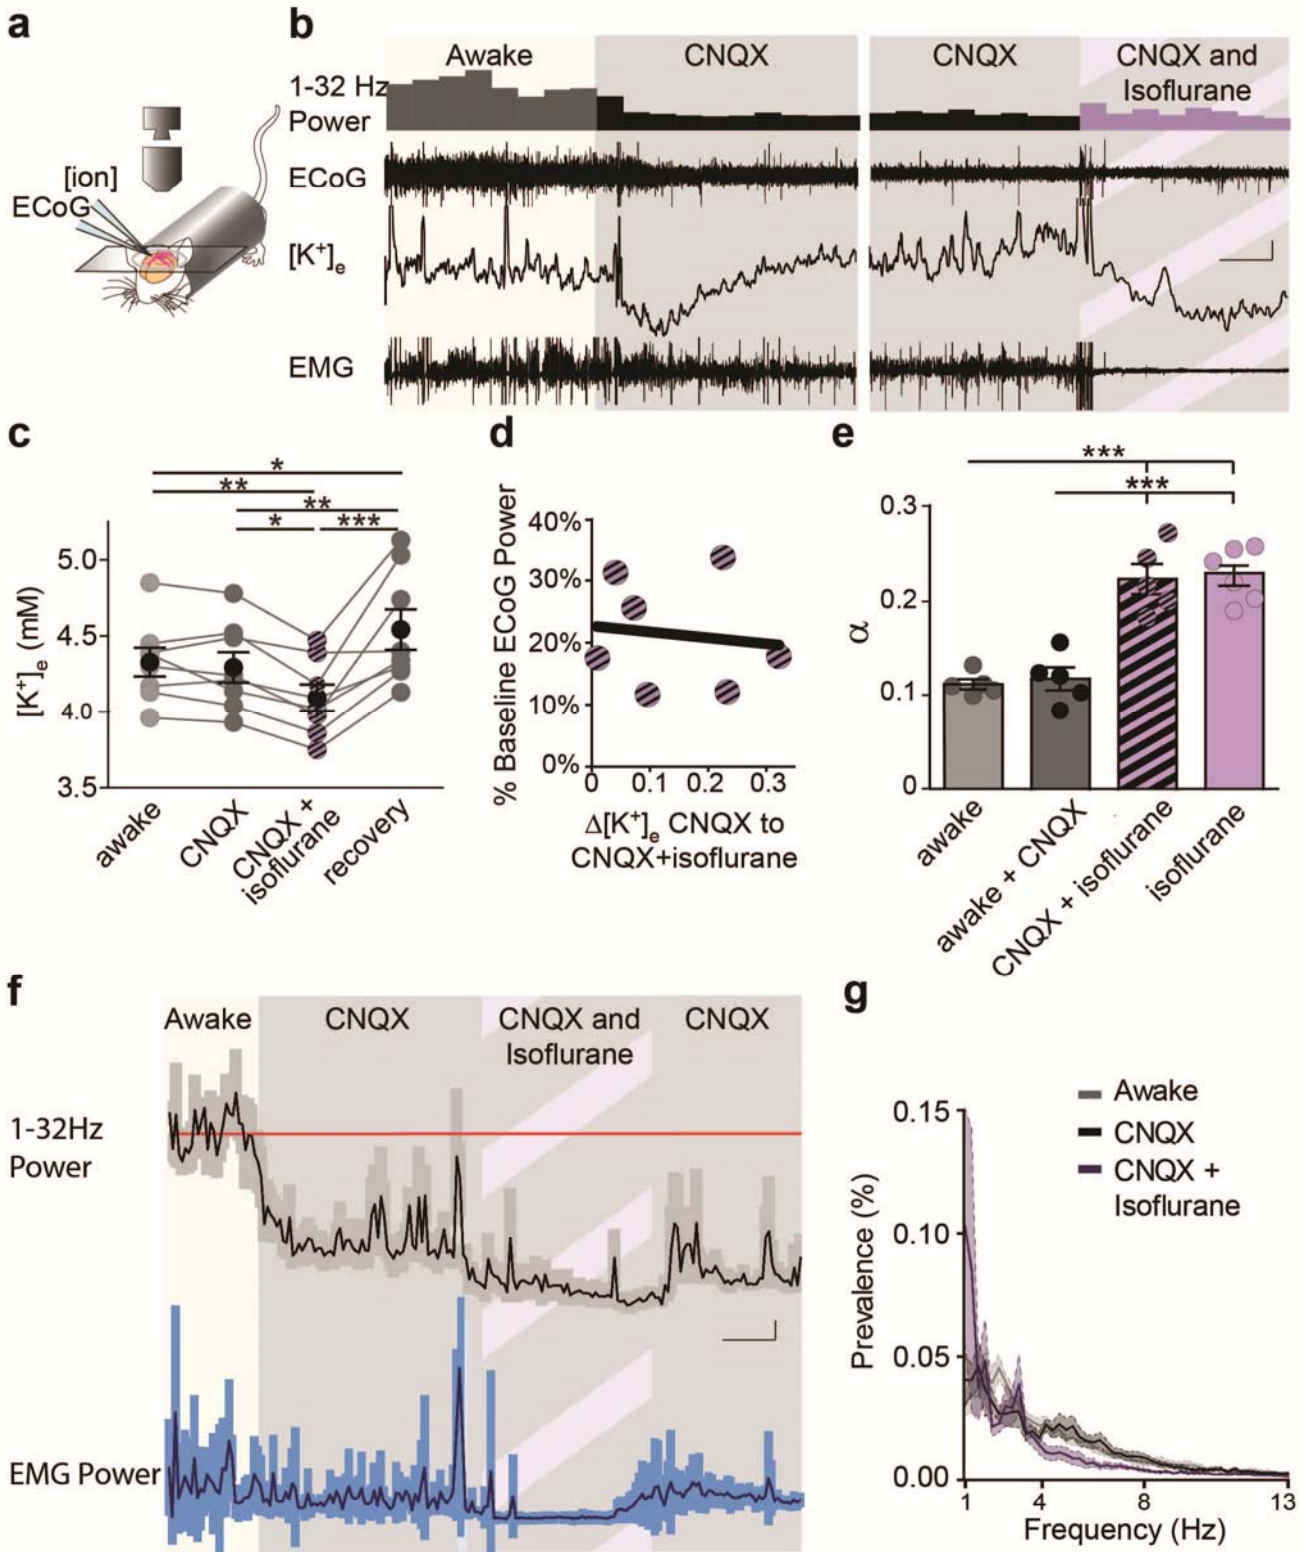

1 **Fig. S2.** Blocking local AMPA receptor activity does not alter awake  $[K^+]_e$  or the isoflurane-  
2 induced decrease in  $[K^+]_e$ . (A) Schematic depicting the recording setup for *in vivo* ion  
3 concentration recordings. Mice rest in a padded tube while ECoG and ISM electrodes are placed  
4 in the somatosensory cortex. EMG recordings are conducted through wires inserted in the neck  
5 musculature. (B) Representative recording of ECoG,  $[K^+]_e$ , and EMG during the application of  
6 AMPA-receptor blocker CNQX (200  $\mu$ M) to the aCSF covering the cranial window of awake  
7 mice (*Left*) and during the induction of isoflurane anesthesia in CNQX-treated mice (*Right*).  
8 Raw 1-32 Hz power is given in the histogram at the top. Note: Animals exhibiting <60%  
9 decrease in ECoG power under CNQX were excluded (C) Summary of analyses comparing  
10 awake, awake + CNQX, isoflurane + CNQX, and CNQX recovery after isoflurane anesthesia.  $n$   
11 = 7 animals; One-way, repeated measures ANOVA:  $F(3,18) = 23.75$ ,  $P < 0.0001$ . Tukey post  
12 hoc multiple comparisons test:  $*P < 0.05$ ,  $**P < 0.01$ ,  $***P < 0.001$ . Scale bars:  $x = 5$  min,  $y =$   
13  $0.2$  mM  $[K^+]_e$ ,  $0.5$  mV ECoG/EMG. (D) Scatter plot of the change in  $[K^+]_e$  in CNQX-treated  
14 animals during the induction of isoflurane anesthesia versus remaining 1-32 Hz power relative to  
15 baseline. A linear regression of the data is given in black. Note: the flat slope suggests that the  
16 reduction in neuronal activity due to CNQX and magnitude of  $[K^+]_e$  shift evoked is independent  
17 of depth of CNQX-mediated inhibition of excitatory activity. (E) Summary of fraction of the  
18 extracellular space volume ( $\alpha$  value, TMA<sup>+</sup> recording) in awake, awake with CNQX, isoflurane  
19 with CNQX, and isoflurane-only animals.  $n = 5$  animals per group for (awake, awake + CNQX,  
20 CNQX +isoflurane) and 6 animals for isoflurane. One-way ANOVA:  $F(3, 17) = 29.20$ ,  $P <$   
21  $0.0001$ . Tukey post-hoc multiple comparisons test:  $***P < 0.001$ . Error bars: mean (black circle)  
22  $\pm$  SEM. (F) (*top*) Mean  $\pm$  SEM of total 1-32 Hz power normalized to the starting 5-minute  
23 baseline pre-CNQX ( $n = 6$  animals). (*Bottom*) Average of all traces for total EMG power  
24 normalized to baseline prior to application of CNQX ( $n = 5$  animals). Data are presented as  
25 mean  $\pm$  SEM analyzed over 4s epochs for the 20 minutes pre-CNQX and 20 minutes following  
26 CNQX, isoflurane, and cessation of isoflurane. Scale bars:  $x = 5$  min,  $y = 25\%$ ,  $20\%$  baseline  
27 ECoG and EMG power, respectively. (G) Summary of relative power from 1-13 Hz, in 0.25 Hz  
28 bins, normalized to total 1-32 Hz power throughout recording period. Note the predominately  
29 overlapping spectra from awake and CNQX traces. Awake (gray), Awake+CNQX (black), and  
30 CNQX + Isoflurane (purple). Data are presented as mean (dark line)  $\pm$  SEM.

31

**Fig. S3**

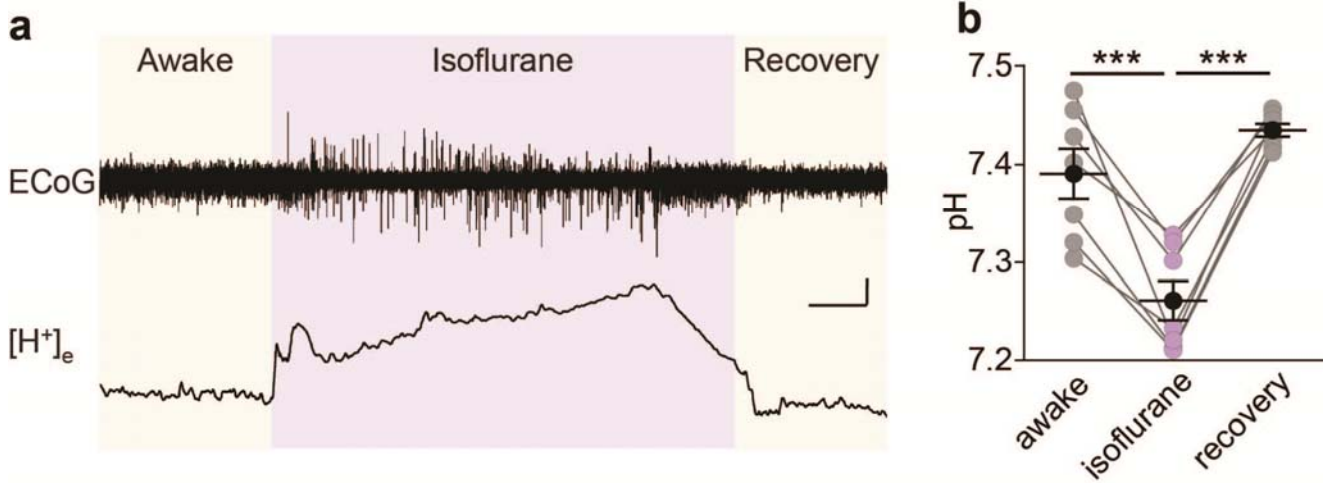

1  
2 **Fig. S3.** Isoflurane anesthesia induces a rapid increase in  $[H^+]_e$  in awake mice. (A) Representative  
3 recording of ECoG and  $[H^+]_e$  in an awake mouse before, during, and after administration of  
4 isoflurane anesthesia. Scale bar: x = 5 min, y = 0.05 pH, 0.5 mV (B) Summary of  $[H^+]_e$  shifts,  
5 converted to pH scale for each mouse during transitions from awake to isoflurane anesthesia.  $n =$   
6 7 animals. One-way, repeated measures ANOVA:  $F(2, 12) = 40.30$ ,  $P < 0.0001$ . Tukey post-hoc  
7 multiple comparisons test:  $***P < 0.001$ . Error bars: mean (black circle)  $\pm$  SEM.

8  
9  
10  
11  
12  
13  
14  
15  
16  
17  
18  
19  
20  
21

**Fig. S4**

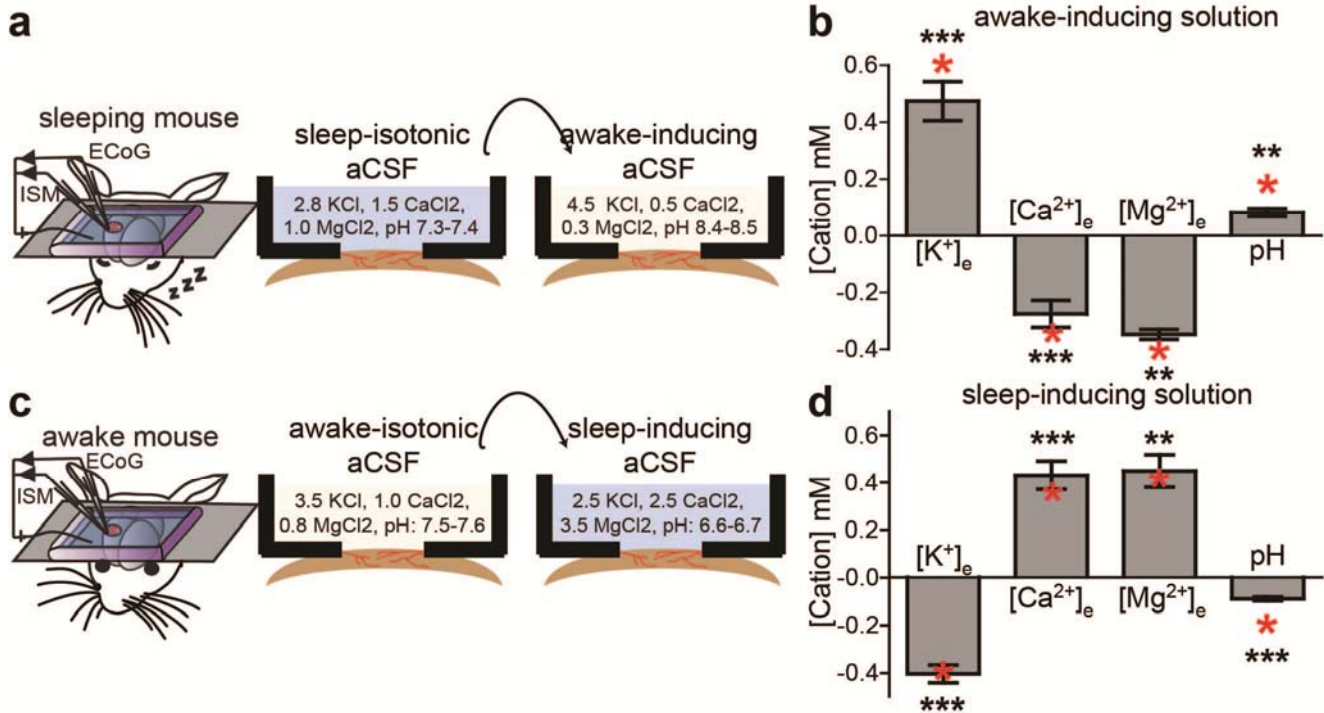

1 **Fig. S4.** Surface aCSF Composition alters extracellular fluid ion concentrations.  
2 (A) Schematic figure depicting animal setup and experiment in which recordings were obtained  
3 in sleeping mice with sleep aCSF covering the cranial window between ZT4-8. Following  
4 baseline recordings, sleep aCSF was removed and replaced with awake-inducing aCSF while the  
5 animals remained asleep. (B) Summary of local ion changes 200  $\mu$ M below the pial surface of  
6 the cortex following the protocol in A. A red asterisk denoting the magnitude of the change in  
7 each ion observed during awake to isoflurane transitions in Figs. 2-4, and Fig. S3 is  
8 superimposed on each column. Note: local changes in the ion composition of aCSF covering the  
9 1-1.5 mm cranial window does not alter global state of the animals. For two-tailed t-test  
10 comparisons of each ion:  $n = 8$   $[K^+]_e$  ( $t(7) = 6.861$ ,  $P = 0.0002$ , 10  $[Ca^{2+}]_e$  ( $t(9) = 5.228$ ,  $P <$   
11  $0.0005$ , 6  $[Mg^{2+}]_e$  ( $t(5) = 19.90$ ,  $P < 0.0001$ ), and 5 pH ( $t(4) = 5.741$ ,  $P = 0.0046$ );  $**P < 0.01$ ,  
12  $***P < 0.001$ ; two-tailed, paired t-test. (C) Schematic figure depicting awake mouse recordings  
13 between ZT16-20. Following baseline acquisition, awake aCSF was replaced with sleep-  
14 inducing aCSF. Note, mice remained awake and active throughout the duration of the  
15 experiment; ion shifts represent local changes recorded at 200  $\mu$ M below the pial surface. (D)  
16 Summary of shifts recorded in mice recorded as in C. Red asterisks of each ion's recorded shift  
17 from awake to isoflurane anesthesia in Figs. 2-4 and Fig. S3 are superimposed. For two-tailed t-

1 test comparisons of each ion:  $n = 8$   $[K^+]_e$  ( $t(7) = 10.66, P < 0.0001$ ) and  $[Ca^{2+}]_e$  ( $t(7) = 6.33, P =$   
2  $0.0004$ ), 7  $[Mg^{2+}]_e$  ( $t(6) = 5.586, P = 0.0014$ ), and 9 pH animals ( $t(8) = 11.18, P < 0.0001$ ).  $**P$   
3  $< 0.01$ ,  $***P < 0.001$ . Error bars: mean  $\pm$  SEM. Solution concentrations are given in table S1.

4  
5  
6  
7  
8  
9  
10  
11  
12  
13  
14  
15  
16  
17  
18  
19  
20  
21  
22  
23  
24  
25  
26  
27  
28  
29  
30  
31

**Fig. S5**

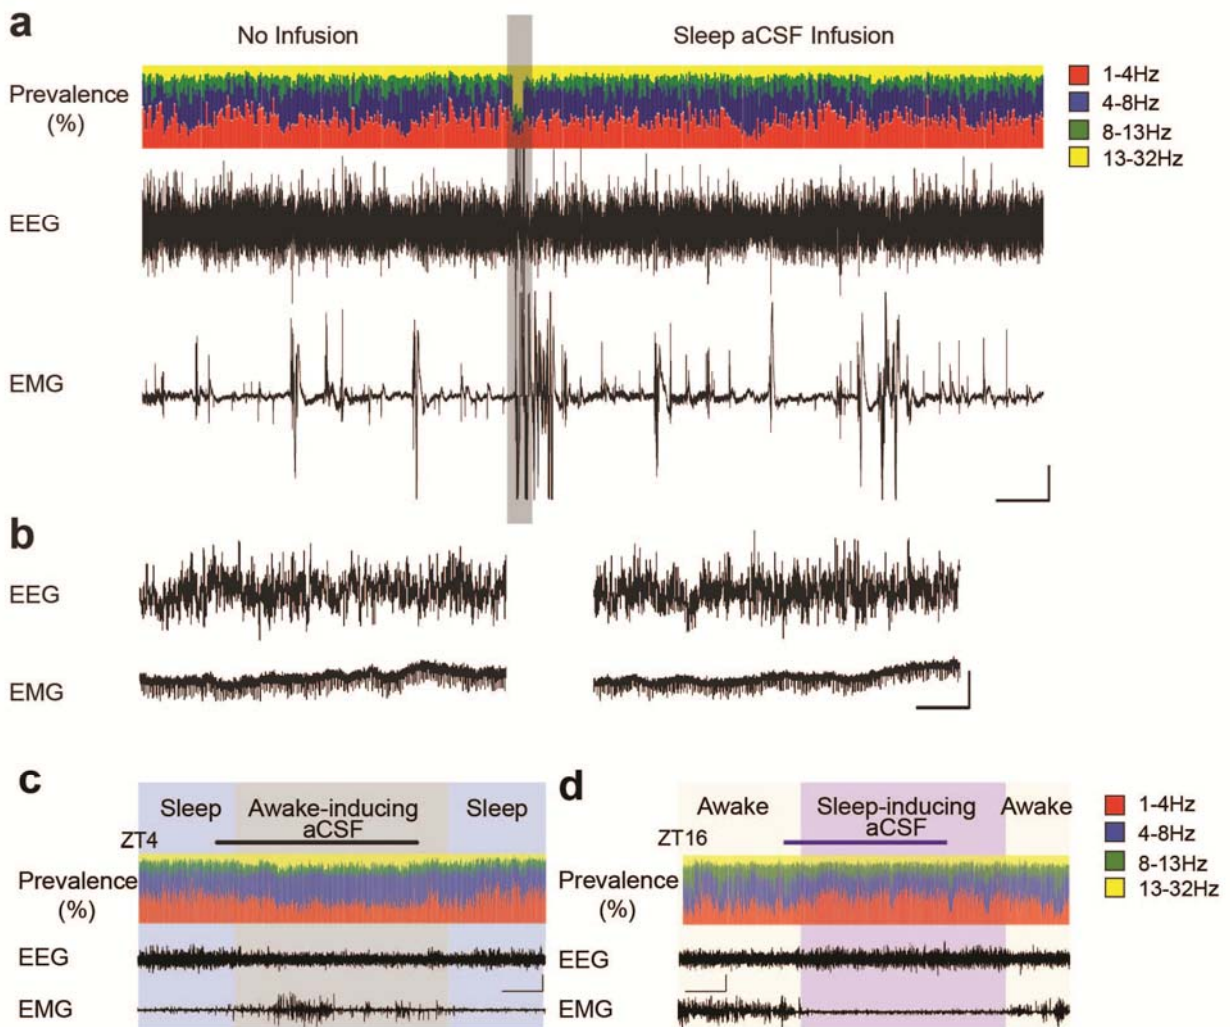

1  
2 **Fig. S5.** Intracisternal infusion of aCSF does not alter cortical EEG. (A) Representative trace  
3 from a single animal illustrating recorded EEG/EMG activity before cisterna-magna infusion of  
4 sleep aCSF. Top row: Relative prevalence for delta (1-4 Hz), theta (4-8 Hz), alpha (8-13 Hz),  
5 and beta (13-32 Hz) in 10 s epochs before and after infusion of aCSF into the cisterna magna.  
6 Scale bar: x = 5 min. y = 0.14 mV EEG, 0.75 mV EMG. (B) High-magnification segments from  
7 A showing representative delta waves before and during infusion of aCSF into the cisterna  
8 magna. Scale bar: x = 5 s, y = 0.15 mV EEG, 0.07 mV EMG. (C-D) Relative prevalence of  
9 representative EEG recordings shown in Fig. 5F and G were plotted in 10 s epochs. Delta (1-4  
10 Hz), theta (4-8 Hz), alpha (8-13 Hz), and beta (13-32 Hz), awake-inducing (C) and sleep-  
11 inducing (D) Scale Bars: Scale bar: x = 30 min, y = 0.5 mV (C), 1mV (D)

1 **Table S1.** aCSF solutions for *in vivo* experiments

2

| Group 1 | Awake aCSF (mM)                                                                     | Sleep-inducing aCSF (mM)                                                                   |
|---------|-------------------------------------------------------------------------------------|--------------------------------------------------------------------------------------------|
|         | 3.5 KCl, 1.0 CaCl <sub>2</sub> , 0.8 MgCl <sub>2</sub><br>pH 7.5-7.6<br>10 mM HEPES | 1.5-2.5 KCl, 2.5 CaCl <sub>2</sub> , 2.5-3.5MgCl <sub>2</sub><br>pH 6.6-6.7<br>10 mM HEPES |
| Group 2 | Sleep aCSF (mM)                                                                     | Awake-inducing aCSF (mM)                                                                   |
|         | 2.8 KCl, 1.5 CaCl <sub>2</sub> , 1.0 MgCl <sub>2</sub><br>pH 7.3-7.4<br>10 mM HEPES | 4.5 KCl, 0.5 CaCl <sub>2</sub> , 0.3 MgCl <sub>2</sub><br>pH 8.4-8.5<br>10 mM HEPES        |

3
